# Supplementary material for: ALDH1 expression predicts progression of premalignant lesions to cancer in Type I endometrial carcinomas
Source: PubMed Central journal article supplement (PMC8184965; doi:10.1038/s41598-021-90570-3), 2021-06-07
Supplement: 41598_2021_90570_MOESM1_ESM.pdf [file 41598_2021_90570_MOESM1_ESM.pdf]

# Supplementary Figure 1

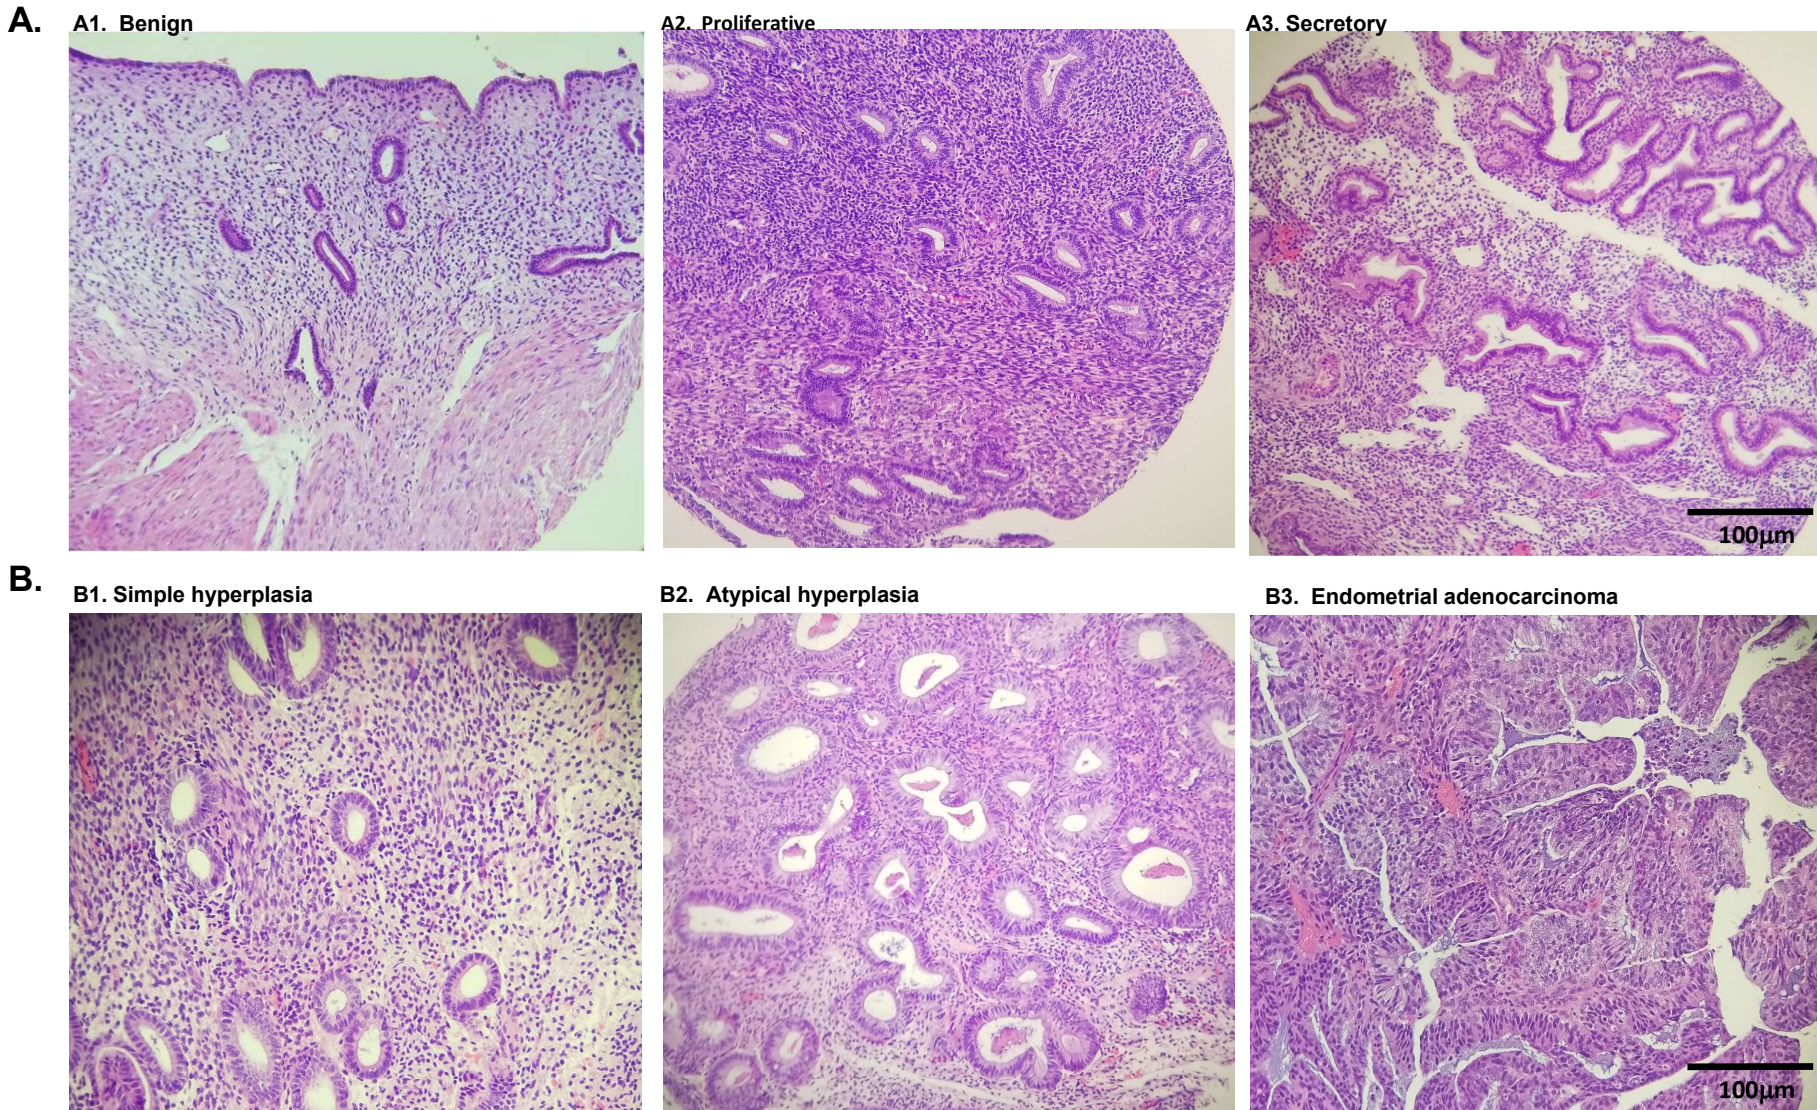

**Fig S1. Progression to endometrial cancer histology.** Hemotoxylin and eosin staining illustrates benign, premalignant and malignant endometrium. Magnification=200X.

**A.**

**Benign endometrium  
nuclear ALDH1**

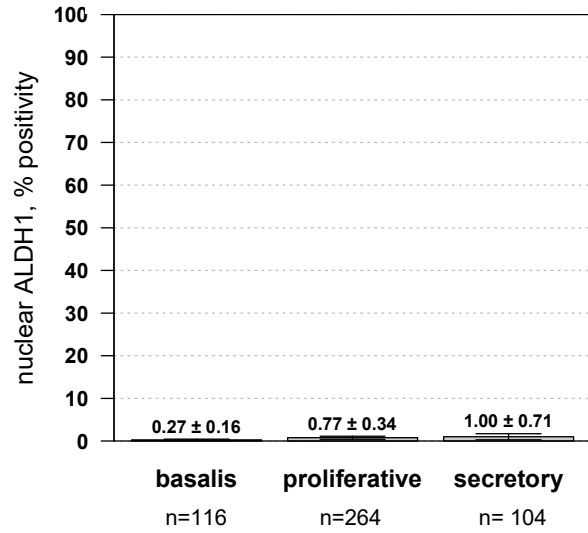

**B.**

**Nuclear ALDH1 positivity by histology**

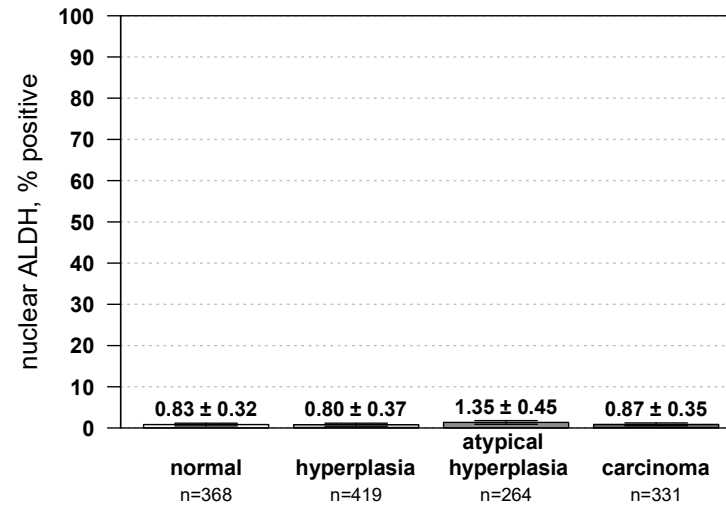

**Fig S2. Nuclear expression of ALDH1.** Low levels of ALDH1 were observed in benign or premalignant nuclei.
